# Supplementary material
Source: publisher figshare collection journal article supplement (https://plos.figshare.com/articles/dataset/_/7771664)
Supplement: Supplementary file 1 [file 1]

Archive with 5 entries (5 files):
- pone.0210497.s001.pdf
- pone.0210497.s002.pdf
- pone.0210497.s003.pdf
- pone.0210497.s004.pdf
- pone.0210497.s005.pdf
