# Supplementary material
Source: publisher figshare collection journal article supplement (https://plos.figshare.com/articles/dataset/_/7771664)
Supplement: Supplementary file 1 [file 1 › pone.0210497.s003.pdf]

### Appendix S3: Results of literature review

Appendix for the paper “*The per-patient costs of HIV services in South Africa: Systematic review and application in the South African HIV Investment Case*” by Gesine Meyer-Rath, Craig van Rensburg, Calvin Chiu, Rahma Leuner and Steve Cohen

| No.                           | Author, year   | Objective                                                       | Target population, setting, level of care                | Cost perspective | Costing method                           | Costing period | Mean cost (2016 USD)                                                                                                                                                                                                                                                                                                                                                                                                           | Range (2016 USD) | ARVs | Other drugs | Labs | Radiology | Staff/Consultation | Consumables | Overhead <sup>1</sup> | Equipment | Transport | Inpatient | Other |
|-------------------------------|----------------|-----------------------------------------------------------------|----------------------------------------------------------|------------------|------------------------------------------|----------------|--------------------------------------------------------------------------------------------------------------------------------------------------------------------------------------------------------------------------------------------------------------------------------------------------------------------------------------------------------------------------------------------------------------------------------|------------------|------|-------------|------|-----------|--------------------|-------------|-----------------------|-----------|-----------|-----------|-------|
| <b>1. Cotrimoxazole</b>       |                |                                                                 |                                                          |                  |                                          |                |                                                                                                                                                                                                                                                                                                                                                                                                                                |                  |      |             |      |           |                    |             |                       |           |           |           |       |
| 1                             | Hausler (2006) | Cost and effectiveness of a package of TB and HIV interventions | General population in Cape Town; CHC, PHC and STI clinic | Provider         | Full economic cost, ingredients approach | 2001 - 2002    | <p>Screening for cotrimoxazole preventative therapy<br/>\$3.13 in community health centre<br/>\$1.57 primary health clinic</p> <p>Cost of screening per person started on cotrimoxazole preventative therapy<br/>\$7.84 in community health centres<br/>\$2.97 in primary health clinic</p> <p>Cost of 6 months of cotrimoxazole preventative therapy<br/>\$12.54 community health centre<br/>\$9.40 primary health clinic</p> | N/S              |      | x           |      |           | x                  | x           | x                     | x         |           |           |       |
| <b>2. ART outpatient cost</b> |                |                                                                 |                                                          |                  |                                          |                |                                                                                                                                                                                                                                                                                                                                                                                                                                |                  |      |             |      |           |                    |             |                       |           |           |           |       |

<sup>1</sup> includes other capital costs in some instances

|   |                  |                                                                                                       |                                                           |          |                                                          |           |                                                                                                                                                                                |                                                                             |   |   |   |  |   |   |   |  |   |   |                   |                         |
|---|------------------|-------------------------------------------------------------------------------------------------------|-----------------------------------------------------------|----------|----------------------------------------------------------|-----------|--------------------------------------------------------------------------------------------------------------------------------------------------------------------------------|-----------------------------------------------------------------------------|---|---|---|--|---|---|---|--|---|---|-------------------|-------------------------|
| 3 | Chimbindi (2015) | Cost associated with accessing public sector care over different stages of illness (TB, pre-ART, ART) | General population in rural KwaZulu-Natal, PHC            | Patient  | Economic and financial costs, bottom up approach         | 2009-2010 | Financial costs per month<br>\$18.61 pre-ART<br>\$17.84 on ART<br><br>Monetized time costs<br>\$6.45 pre-ART<br>\$9.49 on ART                                                  | All SD<br>\$14.61-22.56<br>\$15.37-20.38<br><br>\$5.07-7.84<br>\$4.11-14.88 |   | x |   |  | x |   |   |  | x |   | Opportunity costs |                         |
| 6 | Cleary (2012)    | Explore barriers to access of ART at different treatment sites                                        | Adult population (>18) in rural and urban treatment sites | Patient  | Full financial costs, bottom up                          | N/S       | Expenditure past month<br>\$6.43- to reach ART facility (rural)<br>\$18.34- all healthcare (rural)<br><br>\$1.41- reach ART facility (Urban)<br>\$5.77- all healthcare (Urban) | N/S                                                                         |   | x |   |  |   |   |   |  |   | x |                   | Patient health expenses |
| 7 | Cobb (2013)      | Cost of applying WHO guidelines for the nutritional management of HIV-infected children               | Children in a PHC in rural Hlabisa                        | Provider | Incremental financial costs, ingredients                 | 2010      | \$56.25 /child nutrition, 26 weeks, requiring NCP-B only<br><br>\$178.33 / child nutrition, 26 weeks requiring NCP-C and NCP-B<br><br>\$923.63 average cost of supplying ART   | N/S                                                                         | x |   |   |  |   |   |   |  |   |   |                   | Nutritional supplement  |
| 9 | Deghaye (2006)   | Provide comprehensive costing of HAART to health care workers in different hospitals                  | Health Care Workers                                       | Provider | Full Economic and incremental financial costs, bottom up | 2004      | Total financial cost per year<br>\$1379.18 urban<br>\$896.74 peri-urban<br><br>Total economic cost per year<br>\$1399.80 urban<br>\$1066.89 peri-urban                         | N/S                                                                         | x | x | x |  | x | x | x |  |   |   |                   |                         |

|    |                   |                                                                                              |                                         |          |                                                              |                         |                                                                                                                                                                                                                     |     |   |   |   |   |   |   |   |   |  |  |  |
|----|-------------------|----------------------------------------------------------------------------------------------|-----------------------------------------|----------|--------------------------------------------------------------|-------------------------|---------------------------------------------------------------------------------------------------------------------------------------------------------------------------------------------------------------------|-----|---|---|---|---|---|---|---|---|--|--|--|
| 11 | Harling (2007a)   | Cost of a dedicated ART clinic over pre-ART and 2 years of ART                               | General population                      | Provider | Full financial costs, top down                               | March 2004-Feb 2006     | Cost per patient month<br>\$40.81 in 2004/05<br>\$36.94 in 2005/06<br><br>Cost per visit<br>\$55.49 in 2004/05<br>\$42.16 in 2005/06                                                                                | N/S | x | x |   |   |   | x | x | x |  |  |  |
| 16 | Leisegang (2009)  | Describe the direct costs and establish cost drivers over time in HIV managed care programme | 19+ yrs old, ART naïve                  | Provider | Incremental financial costs, ingredients using AfA data base | N/S                     | Monthly cost<br><br>\$96.96 before ART<br>\$484.79 peri-ART<br>\$193.92 on ART                                                                                                                                      | N/S | x | x |   |   |   |   |   |   |  |  |  |
| 18 | Long (2010)       | Estimate the costs and outcomes of second line ART                                           | Adult patients on second line treatment | Provider | Full financial costs, bottom up                              | N/S                     | Cost 12 months after initiating<br>\$1045.39 all outcomes<br>\$1278.26 care and responding<br>\$1122.01 t in care and not responding<br>\$482.88 no longer in care                                                  | N/S | x | x | x |   | x | x | x |   |  |  |  |
| 19 | Martinson (2009)  | Estimate the cost of initiating and maintaining patients on ART                              | Adults                                  | Provider | Full financial costs, bottom up                              | October 2004-March 2005 | Monthly costs<br>\$96.48 overall per patient<br>\$61.77 per patient not on ART<br>\$117. per patient on ART<br>\$105.24 for month prior to ART<br>\$206.25 month of ART initiation<br>\$127.69 after ART initiation |     | x | x | x | x | x |   |   | x |  |  |  |
| 21 | Meyer-Rath (2013) | Annalise ART cost                                                                            | Children (initiated ART, 13 yrs old)    | Provider | Full financial costs, bottom up                              | 2005-2009               | Per 24 month outcome<br>\$723.63 all in care<br>\$652.11 all in sample<br>\$304.88 not in care<br>\$758.45 in care not responding<br>\$707.63 in care responding                                                    |     | x | x | x | x | x | x | x |   |  |  |  |

|    |                  |                                                                               |                    |          |                                              |                       |                                                                                                                                                                                                                                                                                                                                                   |                                                                     |   |   |   |  |   |   |   |   |   |  |                  |
|----|------------------|-------------------------------------------------------------------------------|--------------------|----------|----------------------------------------------|-----------------------|---------------------------------------------------------------------------------------------------------------------------------------------------------------------------------------------------------------------------------------------------------------------------------------------------------------------------------------------------|---------------------------------------------------------------------|---|---|---|--|---|---|---|---|---|--|------------------|
| 22 | Moshabela (2012) | Investigate factors associated with patterns of plural healthcare utilization | Adults             | Patient  | Incremental financial costs, bottom up       | April 2008-March 2009 | Report expenditure 4 weeks prior to ART visit<br>\$5.65 private chemist<br>\$8.47 self-care<br>\$17.88 doctor<br>\$6.59 primary health clinic                                                                                                                                                                                                     | IQR<br>\$2.82-12.23<br>\$2.82-23.52<br>17.88-28.23<br>0.94-2.82 IQR |   | x |   |  | x |   |   |   |   |  |                  |
| 25 | Rosen (2007)     | Estimate the costs patient occur in obtaining ART                             | Adults             | Patient  | Full financial and economic costs, bottom up | July 2005-June 2006   | Total cost per visit<br>\$15.83 urban hospital<br>\$10.20 informal settlement clinic<br>\$18.88 rural clinic<br>\$14.62 all                                                                                                                                                                                                                       |                                                                     |   |   |   |  | x |   |   |   | x |  | Opportunity cost |
| 26 | Rosen (2008)     | Estimate outpatient cost per patient in care and responding to treatment      | General population | Provider | Full financial costs, bottom up              | N/S                   | Annual cost per patient initiated:<br>\$747.59 referral hospital<br>\$886.04 private GP<br>\$921.64 HIV clinic<br>\$1113.48 NGO clinic<br>\$917.68 all sites<br><br>Cost to produce patient in care and responding:<br>\$1115.46 referral hospital<br>\$1703.84 private GP<br>\$1463.54 HIV clinic<br>\$1465.52 NGO clinic<br>\$1422.01 all sites | N/A                                                                 | x | x | x |  | x | x | x | x |   |  |                  |
| 27 | Tagar (2014)     | Describe facility-level cost of ART in a random sample of facilities          | General population | Provider | Full financial costs, top down               | 2011                  | Average cost of treatment per year<br>\$521.46 weighted mean<br>\$597.71 simple mean<br><br>Average 1 <sup>st</sup> line cost<br>\$160 cost for adults                                                                                                                                                                                            |                                                                     | x | x | x |  | x | x | x | x |   |  | Nutritional      |

[illegible]



[illegible]

[illegible]

[illegible]

|    |               |                                                                                                                |                        |          |                                                     |           |                                                                                                                                                                                                                                                                                                                                                                                                                                                                                                                                                                                                                                                                                                             |                                                |   |   |  |  |   |   |   |   |   |   |                        |
|----|---------------|----------------------------------------------------------------------------------------------------------------|------------------------|----------|-----------------------------------------------------|-----------|-------------------------------------------------------------------------------------------------------------------------------------------------------------------------------------------------------------------------------------------------------------------------------------------------------------------------------------------------------------------------------------------------------------------------------------------------------------------------------------------------------------------------------------------------------------------------------------------------------------------------------------------------------------------------------------------------------------|------------------------------------------------|---|---|--|--|---|---|---|---|---|---|------------------------|
| 30 | Barton (2013) | Estimate cost effectiveness of nurse-led ART vs doctor lead ART                                                | Adult population (16+) | Provider | Full financial costs, bottom up                     | 2008-2010 | Cost at 12 months post enrollment, patients CD4 <=350 and not yet on ART<br><br>\$383.05 nurse lead ART<br>\$285.70 doctor lead ART<br>\$23,444 per death averted<br><br>Costs at 12 months post enrollment, Patients on ART at enrollment<br>460.68 nurse lead ART<br>402.91 doctor lead ART<br>12,042 per undetectable viral load                                                                                                                                                                                                                                                                                                                                                                         | 95% CI<br>\$17,529-19,625<br><br>\$7,079-9,550 | x | x |  |  | x | x | x |   |   | x | Set up costs           |
| 31 | Foster (2012) | Evaluate indirectly supervised pharmacists' assistant (ISPA) and nurse based care against full time pharmacist | General population     | Societal | Incremental financial and economic costs, bottom up | 2009      | Average annual costs:<br>\$109.67 per patient with full time pharmacist (baseline)<br>\$10.68 incremental cost for patient through ISPA<br>\$27.11 incremental cost per patient through nurse<br><br>Average societal cost per visit:<br>\$14.10 with full time pharmacist (baseline)<br>-\$2.89 incremental cost with ISPA<br>-\$0.11 incremental cost with nurse<br><br>Average cost to patient per visit<br>\$8.54 with full time pharmacist (baseline)<br>-\$2.21 incremental cost with ISPA<br>-\$3.19 incremental cost with nurse<br><br>Average cost to patient per visit<br>\$5.57 with full time pharmacist (baseline)<br>-\$0.69 incremental cost with ISPA<br>\$3.07 incremental cost with nurse | N/S                                            |   |   |  |  | x |   |   | x | x |   | Indirect patient costs |

|    |              |                                                                                                                                  |                                    |          |                                        |                   |                                                                                                                                                                                                  |                                                                                                                                                  |   |   |   |  |   |   |   |   |  |  |  |  |
|----|--------------|----------------------------------------------------------------------------------------------------------------------------------|------------------------------------|----------|----------------------------------------|-------------------|--------------------------------------------------------------------------------------------------------------------------------------------------------------------------------------------------|--------------------------------------------------------------------------------------------------------------------------------------------------|---|---|---|--|---|---|---|---|--|--|--|--|
| 32 | Long (2011)  | Evaluate cost effectiveness of down referring from doctor managed to nurse managed ART in primary health care                    | Stable patients on ART > 11 months | Provider | Full financial costs, bottom up        | N/S               | <p>Cost per patient:</p> <p>514.55 DR/Hospital</p> <p>463.95 Down referral</p> <p>Cost per patient in care and responding:</p> <p>526.01 DR/Hospital</p> <p>469.98 Down referral</p>             | <p>Cost per patient (SD)</p> <p>\$379.95-649.15</p> <p>\$70.40-557.51</p> <p>Cost in care (SD)</p> <p>\$403.81-648.20</p> <p>\$385.67-553.69</p> | x | x | x |  | x | x | x | x |  |  |  |  |
| 45 | Fatti (2016) | Compare pharmaceutical care quality, clinical outcomes and provider staff costs between task shifting pharmaceutical care models | ART naïve adults, 16 yrs and older | Provider | Incremental financial costs, bottom up | Jan 2013-Dec 2013 | <p>Mean staff cost per visit</p> <p>\$130 through ISPA</p> <p>1.82 through nurse managed</p> <p>Staff cost per item dispensed</p> <p>\$0.41 through ISPA</p> <p>\$0.81 through nurse managed</p> | N/S                                                                                                                                              |   |   |   |  | x |   |   |   |  |  |  |  |

|    |                     |                                                                                                    |                    |          |                                 |             |                                                                                                                                                                                                                                      |                                                                                                                                                                 |   |   |   |   |   |  |   |   |  |  |  |              |
|----|---------------------|----------------------------------------------------------------------------------------------------|--------------------|----------|---------------------------------|-------------|--------------------------------------------------------------------------------------------------------------------------------------------------------------------------------------------------------------------------------------|-----------------------------------------------------------------------------------------------------------------------------------------------------------------|---|---|---|---|---|--|---|---|--|--|--|--------------|
| 53 | Long (2016)         | Compare outcomes and costs of NIMART between primary health clinics and hospital based HIV clinics | Adults >18yr       | Provider | Full financial costs, bottom up | 2014        | Average cost for all patients:<br>323.74 HIV outpatient<br>201.63 PHC<br><br>Average cost per patient alive & in care<br>405.15 HIV outpatient<br>225.29 PHC<br><br>Average cost per dead/LTFU<br>115.49 HIV outpatient<br>94.66 PHC | All patients (95%)<br>308.60-338.89<br>193.11-210.15<br><br>Alive & in care<br>399.47-427.87<br>220.56-230.97<br><br>Dead/LTFU<br>100.34-129.69<br>82.36-106.97 | x | x | x | x | x |  | x | x |  |  |  |              |
|    | 4. SMS notification |                                                                                                    |                    |          |                                 |             |                                                                                                                                                                                                                                      |                                                                                                                                                                 |   |   |   |   |   |  |   |   |  |  |  |              |
| 33 | De Tolly (2012)     | Investigate effectiveness of SMS to encourage HCT                                                  | General population | Provider | Full financial costs, bottom up | N/S (?2011) | \$0.02 per sms<br><br>\$1.76 per additional tester                                                                                                                                                                                   | N/S                                                                                                                                                             |   |   |   |   |   |  |   |   |  |  |  | Cost per sms |
|    | 5. Adherence clubs  |                                                                                                    |                    |          |                                 |             |                                                                                                                                                                                                                                      |                                                                                                                                                                 |   |   |   |   |   |  |   |   |  |  |  |              |

|                                                                                      |                |                                                                                                                                 |                                                          |                            |                                          |                |                                                                                                                                                                                                                                                                     |     |   |   |   |  |   |   |   |   |   |  |                           |
|--------------------------------------------------------------------------------------|----------------|---------------------------------------------------------------------------------------------------------------------------------|----------------------------------------------------------|----------------------------|------------------------------------------|----------------|---------------------------------------------------------------------------------------------------------------------------------------------------------------------------------------------------------------------------------------------------------------------|-----|---|---|---|--|---|---|---|---|---|--|---------------------------|
| 34                                                                                   | Bango (2016)   | Assess cost effectiveness of lay health worker led group adherence clubs and describe and evaluate the associated patient costs | Adult, stable patients                                   | Provider and patient costs | Full financial costs, top down           | 2011           | Total cost per visit:<br>\$12.97 adherence club<br>\$14.16 standard of care<br><br>Patient transport costs<br>\$0.71 adherence club<br>\$1.15 standard of care<br><br>Total cost per patient yr<br>\$235.45 adherence club<br>\$293.53 standard of care             | N/S | x |   | x |  | x | x | x | x | x |  | Patient opportunity costs |
| <b>6. HIV counselling and testing (HCT)/ Voluntary counselling and testing (VCT)</b> |                |                                                                                                                                 |                                                          |                            |                                          |                |                                                                                                                                                                                                                                                                     |     |   |   |   |  |   |   |   |   |   |  |                           |
| 36                                                                                   | Basset (2007)  | Evaluate the yield of routine VCT vs provider referred VCT                                                                      | General population                                       | Provider                   | Full financial costs, top down           | Jan – Mar 2005 | Cost per test<br>\$9 referral<br>\$8.56 routine VCT<br><br>Cost per HIV positive person identified<br>\$13.48 referral<br>\$25.81 routine VCT                                                                                                                       | N/S |   |   |   |  | x | x | x |   |   |  |                           |
| 1                                                                                    | Hausler (2006) | Cost and effectiveness of a package of TB and HIV interventions                                                                 | General population in Cape Town; CHC, PHC and STI clinic | Provider                   | Full economic cost, ingredients approach | 2001 - 2002    | Cost per VCT completed<br>\$14.10 at community care center<br>\$17.24 at primary health clinic<br>\$10.97 at STI clinic<br><br>Cost per HIV infection averted<br>\$145.74 at community health center<br>\$175.51 at primary health clinic<br>\$104.99 at STI clinic | N/S |   | x |   |  | x | x | x | x |   |  |                           |

[illegible]

[illegible]

|    |                   |                                                                                                                                                 |                        |          |                                   |                |                                                                                                                                                                                                                                                                                                                              |                                                                                            |  |   |   |  |   |   |   |   |   |  |                   |
|----|-------------------|-------------------------------------------------------------------------------------------------------------------------------------------------|------------------------|----------|-----------------------------------|----------------|------------------------------------------------------------------------------------------------------------------------------------------------------------------------------------------------------------------------------------------------------------------------------------------------------------------------------|--------------------------------------------------------------------------------------------|--|---|---|--|---|---|---|---|---|--|-------------------|
| 46 | Tchuenche (2016a) | Derive the unit cost of delivering VMMC at the facility level and to identify the level of spending currently incurred for VMMC demand creation | Men and boys           | Provider | Full financial costs, ingredients | Jan-Dec 2014   | Per circumcision performed<br>\$124.95 across all facilities<br>\$131.11 in facilities with outreach services<br>\$123.15 in facilities without outreach services<br>\$110.75 urban facilities<br>\$137.26 peri-urban facilities<br>\$111.70 rural facilities<br>\$145.78 in hospitals<br>\$114.54 health care centre/clinic | SD<br><br>\$116.24-145.97<br><br>\$115.37-130.94<br><br>\$136.87-154.69<br>\$105.97-123.10 |  | x | x |  | x | x | x | x |   |  |                   |
| 47 | Tchuenche (2016b) | To provide useful information on the scope of financial barriers that VMMC clients face                                                         | Follow up VMMC clients | Patient  | Full economic costs, bottom up    | Apr – May 2015 | Average transport costs<br>\$8.26 all clients<br>\$9.43 urban clients<br>\$7.45 peri-urban clients<br>\$9.70 rural clients                                                                                                                                                                                                   | N/S                                                                                        |  | x |   |  |   |   |   |   | x |  | Opportunity costs |

IQR – Interquartile range

CI – Confidence interval

ISPA – Indirectly supervised pharmacist assistant
