# Supplementary material
Source: publisher figshare collection journal article supplement (https://plos.figshare.com/articles/dataset/_/7771664)
Supplement: Supplementary file 1 [file 1 › pone.0210497.s004.pdf]

## Appendix S4: Details of ingredient-based unit costs [2017/18 ZAR]

Appendix for the paper “The per-patient costs of HIV services in South Africa: Systematic review and application in the South African HIV Investment Case” by Gesine Meyer-Rath, Craig van Rensburg, Calvin Chiu, Rahma Leuner and Steve Cohen

**\*\*NB: For updates or additional details regarding unit costs based on ingredients, please contact the corresponding author at gesine@bu.edu; for updates regarding unit costs based on literature, please contact the corresponding author of the original paper.\*\***

### 1. PMTCT

| Intervention                                           | PMTCT (mother not on ART, presenting in labour)                                                                        |           |                         |          |                                       |            |
|--------------------------------------------------------|------------------------------------------------------------------------------------------------------------------------|-----------|-------------------------|----------|---------------------------------------|------------|
| Costing method                                         | Ingredients (NB, these are drug costs only; assumed to be incremental to standard perinatal care and postnatal visits) |           |                         |          |                                       |            |
| Total cost                                             | R 316.65 per mother-baby pair                                                                                          |           |                         |          |                                       |            |
| Ingredient                                             | Unit cost                                                                                                              | Cost unit | Source of unit cost     | Quantity | Source of ingredient and/ or quantity | Total cost |
| Single dose NVP + AZT 3-hourly in labour; TDF+FTC stat | R 5.20                                                                                                                 | per child | 2018 drug tender prices | 1        |                                       | R 5.20     |
| NVP coverage during breastfeeding (12 months)          | R 311.45                                                                                                               | per child | 2018 drug tender prices | 1        |                                       | R 311.45   |

| Intervention:                                 | PMTCT (mother not on lifelong ART)                                                                            |            |                         |          |        |            |
|-----------------------------------------------|---------------------------------------------------------------------------------------------------------------|------------|-------------------------|----------|--------|------------|
| Costing method:                               | Ingredients (NB, these are drug costs only; assumed to be incremental to standard ante- and postnatal visits) |            |                         |          |        |            |
| Total cost                                    | R 2,125.74 per mother-baby pair                                                                               |            |                         |          |        |            |
| Ingredient                                    | Unit cost                                                                                                     | Cost unit  | Source                  | Quantity | Source | Total cost |
| NVP coverage during breastfeeding (6 weeks)   | R 36.31                                                                                                       | per child  | 2018 drug tender prices | 1        |        | R 36.31    |
| Triple ART during pregnancy and breastfeeding | R 2,089.43                                                                                                    | per mother | 2018 drug tender prices | 1        |        | R 2,089.43 |

| Intervention:   | Infant testing at birth |                          |                              |          |                |            |
|-----------------|-------------------------|--------------------------|------------------------------|----------|----------------|------------|
| Costing method: | Ingredients             |                          |                              |          |                |            |
| Total cost      | R 442.23 per test       |                          |                              |          |                |            |
| Ingredient      | Unit cost               | Cost unit                | Source                       | Quantity | Source         | Total cost |
| Staff Nurse     | R 2.56                  | per minute of staff time | 2018 Government Salary Scale | 20       | ZoeLife        | R 51.28    |
| Counsellor      | R 0.99                  | per minute of staff time |                              | 10       | ZoeLife        | R 9.92     |
| HIV PCR         | R 380.02                | per test                 | NHLS prices March 2017       | 1        | ZoeLife        | R 380.02   |
| Gloves          | R 50.82                 | per pack of 50 pairs     | Treasury contract RT76-2016  | 0.02     | Own assumption | R 1.02     |

|                        |                                    |                          |                              |                 |                |                   |
|------------------------|------------------------------------|--------------------------|------------------------------|-----------------|----------------|-------------------|
| <b>Intervention:</b>   | <b>Infant testing at six weeks</b> |                          |                              |                 |                |                   |
| <b>Costing method:</b> | Ingredients                        |                          |                              |                 |                |                   |
| <b>Total cost</b>      | <b>R 416.59 per test</b>           |                          |                              |                 |                |                   |
| <b>Ingredient</b>      | <b>Unit cost</b>                   | <b>Cost unit</b>         | <b>Source</b>                | <b>Quantity</b> | <b>Source</b>  | <b>Total cost</b> |
| Staff Nurse            | R 2.56                             | per minute of staff time | 2018 Government Salary Scale | 10              | ZoeLife        | R 25.64           |
| Counsellor             | R 0.99                             | per minute of staff time |                              | 10              | ZoeLife        | R 9.92            |
| HIV PCR                | R 380.02                           | per test                 | NHLS prices March 2017       | 1               | ZoeLife        | R 380.02          |
| Gloves                 | R 50.82                            | per pack of 50 pairs     | Treasury contract RT76-2016  | 0.02            | Own assumption | R 1.02            |

## 2. Social behaviour change communication (SBCC)

|                       |                                                                         |
|-----------------------|-------------------------------------------------------------------------|
| <b>Intervention</b>   | <b>SBCC campaign 1 (message: adolescent testing, multiple partners)</b> |
| <b>Costing method</b> | Expenditure (personal communication, implementing agencies)             |
| <b>Total cost</b>     | <b>R 12.10 per person reached</b>                                       |

|                       |                                                             |
|-----------------------|-------------------------------------------------------------|
| <b>Intervention</b>   | <b>SBCC campaign 2 (message: condom usage)</b>              |
| <b>Costing method</b> | Expenditure (personal communication, implementing agencies) |
| <b>Total cost</b>     | <b>R 6.19 per person reached</b>                            |

|                       |                                                             |
|-----------------------|-------------------------------------------------------------|
| <b>Intervention</b>   | <b>SBCC campaign 3 (message: testing, condom usage)</b>     |
| <b>Costing method</b> | Expenditure (personal communication, implementing agencies) |
| <b>Total cost</b>     | <b>R 3.39 per person reached</b>                            |

## 3. Comprehensive condom programming

|                              |                                      |                  |                        |                   |                        |                   |
|------------------------------|--------------------------------------|------------------|------------------------|-------------------|------------------------|-------------------|
| <b>Intervention:</b>         | <b>Condom distribution</b>           |                  |                        |                   |                        |                   |
| <b>Costing method:</b>       | Ingredients                          |                  |                        |                   |                        |                   |
| <b>Total cost</b>            | <b>R 0.74 per condom distributed</b> |                  |                        |                   |                        |                   |
| <b>Ingredient</b>            | <b>Unit cost</b>                     | <b>Cost unit</b> | <b>Source</b>          | <b>Quantity</b>   | <b>Source</b>          | <b>Total cost</b> |
| Male condom + distribution   | R 0.63                               | per condom       | 2015-18 Condom tenders | 0.98              | 2015-18 Condom tenders | R 0.62            |
| Female condom + distribution | R 6.16                               | per condom       | 2015-18 Condom tenders | 0.02 <sup>1</sup> | 2015-18 Condom tenders | R 0.13            |

<sup>1</sup> These represent the relative quantities of male and female condoms planned in the 2012 condom tender.

|                                |                                         |                          |                              |                 |               |                   |
|--------------------------------|-----------------------------------------|--------------------------|------------------------------|-----------------|---------------|-------------------|
| <b>Intervention:</b>           | <b>Male and female condom education</b> |                          |                              |                 |               |                   |
| <b>Costing method:</b>         | Literature, updated from [1]            |                          |                              |                 |               |                   |
| <b>Total cost</b>              | <b>R 66.06 per person trained</b>       |                          |                              |                 |               |                   |
| <b>Ingredient</b>              | <b>Unit cost</b>                        | <b>Cost unit</b>         | <b>Source</b>                | <b>Quantity</b> | <b>Source</b> | <b>Total cost</b> |
| Male condom                    | R 0.52                                  | per condom               | 2015-18 Condom tenders       | 1               | [1]           | R 0.52            |
| Female condom                  | R 6.14                                  | per condom               | 2015-18 Condom tenders       | 1               | [1]           | R 6.14            |
| Counsellor (first session)     | R 0.99                                  | per minute of staff time | 2018 Government Salary Scale | 30              | [1]           | R 29.70           |
| Counsellor (follow-up session) | R 0.99                                  |                          |                              | 30              | [1]           | R 29.70           |

#### 4. Care and treatment

|                        |                                                                                                                                                                                                                                                                                                                                                                                                                                                                                                                                                                                                   |
|------------------------|---------------------------------------------------------------------------------------------------------------------------------------------------------------------------------------------------------------------------------------------------------------------------------------------------------------------------------------------------------------------------------------------------------------------------------------------------------------------------------------------------------------------------------------------------------------------------------------------------|
| <b>Intervention:</b>   | <b>ART</b>                                                                                                                                                                                                                                                                                                                                                                                                                                                                                                                                                                                        |
| <b>Costing method:</b> | National ART Cost Model (NACM) 2017/18                                                                                                                                                                                                                                                                                                                                                                                                                                                                                                                                                            |
| <b>Total cost</b>      | <p> <b>R 3,318.62 per patient year (all adults)</b><br/> <b>R 2,760.87 per adult on first line treatment</b><br/> <b>R 2,771.13 per adult in first line treatment failure</b><br/> <b>R 8,705.15 per adult on second line ART</b><br/> <b>R 9,272.15 per adult in second line treatment failure</b><br/> <b>R 18,688.12 per adult on third line ART</b> </p> <p> <b>R 3,784.19 per patient year (children)</b><br/> <b>R 3,720.73 per child on first line treatment</b><br/> <b>R 4,466.98 per child in first line treatment failure</b><br/> <b>R 4,763.82 per child on second line ART</b> </p> |

|                        |                                    |
|------------------------|------------------------------------|
| <b>Intervention:</b>   | <b>Palliative care</b>             |
| <b>Costing method:</b> | Personal communication, A. Lolliot |
| <b>Total cost</b>      | <b>R 948.48 per patient</b>        |

|                        |                                                                                                                                                                                                                                                                                                                                                                                                                                                                                                                                                                         |
|------------------------|-------------------------------------------------------------------------------------------------------------------------------------------------------------------------------------------------------------------------------------------------------------------------------------------------------------------------------------------------------------------------------------------------------------------------------------------------------------------------------------------------------------------------------------------------------------------------|
| <b>Intervention:</b>   | <b>Inpatient care</b>                                                                                                                                                                                                                                                                                                                                                                                                                                                                                                                                                   |
| <b>Costing method:</b> | Updated from literature [2], using different CD4 strata                                                                                                                                                                                                                                                                                                                                                                                                                                                                                                                 |
| <b>Total cost</b>      | <p> <b>R 1,694.94 per patient year (pre-ART, &lt;200 cells/microl)</b><br/> <b>R 989.47 per patient year (pre-ART, 200-349 cells/microl)</b><br/> <b>R 808.77 per patient year (pre-ART, 350-500 cells/microl)</b><br/> <b>R 393.23 per patient year (pre-ART, &gt;500 cells/microl)</b><br/> <b>R 2,079.97 per patient year (ART, &lt;200 cells/microl)</b><br/> <b>R 989.47 per patient year (ART, 200-349 cells/microl)</b><br/> <b>R 808.77 per patient year (ART, 350-500 cells/microl)</b><br/> <b>R 393.23 per patient year (ART, &gt;500 cells/microl)</b> </p> |

#### 5. Medical male circumcision

|                        |                                    |
|------------------------|------------------------------------|
| <b>Intervention:</b>   | <b>Medical male circumcision</b>   |
| <b>Costing method:</b> | Literature [3]                     |
| <b>Total cost</b>      | <b>R 1,770.29 per circumcision</b> |

|                        |                                                                            |
|------------------------|----------------------------------------------------------------------------|
| <b>Intervention:</b>   | <b>Early infant male circumcision</b>                                      |
| <b>Costing method:</b> | Ingredients                                                                |
| <b>Total cost</b>      | <b>R 885.14 per circumcision (assumed to be 50% of adult circumcision)</b> |

## 6. HIV counselling and testing (HCT)

|                         |                                                 |                          |                              |                 |                                                           |                   |
|-------------------------|-------------------------------------------------|--------------------------|------------------------------|-----------------|-----------------------------------------------------------|-------------------|
| <b>Intervention:</b>    | <b>General population HCT (negative result)</b> |                          |                              |                 |                                                           |                   |
| <b>Costing method:</b>  | Ingredients Update from literature [4]          |                          |                              |                 |                                                           |                   |
| <b>Total cost</b>       | <b>R 48.24 per test</b>                         |                          |                              |                 |                                                           |                   |
| <b>Ingredient</b>       | <b>Unit cost</b>                                | <b>Cost unit</b>         | <b>Source</b>                | <b>Quantity</b> | <b>Source</b>                                             | <b>Total cost</b> |
| Rent and electricity    | R 3,181.95                                      | per month                | Estimate                     | 0.001           | Assumed                                                   | R 3.18            |
| Security guard          | R 0.55                                          | per minute of staff time | 2018 Government Salary Scale | 0.5             | [9]                                                       | R 0.27            |
| Counsellor              | R 0.99                                          | per minute of staff time | 2018 Government Salary Scale | 17              | [9]                                                       | R 16.86           |
| Clerk                   | R 1.29                                          | per minute of staff time | 2018 Government Salary Scale | 4               | [9]                                                       | R 5.17            |
| Furniture and equipment | R 1 178                                         | rental cost per month    | Retail quote                 | 0.001           | Assumed. Equipment supports 1,000 patients seen per month | R 1.18            |
| Paper flip file         | R 5.00                                          | per material             | Retail quote                 | 1               | Assumed                                                   | R 5.00            |
| Bond paper              | R 58.80                                         | per 500 pages            | Retail quote                 | 0.004           | Assumed 2 sheets used                                     | R 0.36            |
| Biosscrub               | R 155.18                                        | Per 5L                   | Treasury contract            | 0.0002          | Assumed                                                   | R 0.03            |
| Gloves                  | R 50.82                                         | per pack (100)           | Treasury contract RT76-2016  | 0.02            | RSA GF proposal for continued funding, 2013               | R 1.03            |
| Cotton wool swabs       | R 81.65                                         | per pack (100)           | Treasury contract            | 0.01            | RSA GF proposal for continued funding, 2013               | R 0.82            |
| First response test kit | R 8.17                                          | per test                 | Treasury contract RT41-2017  | 1.01            | RSA GF proposal for continued funding, 2013               | R8.25             |
| Biohazard bag           | R 0.09                                          | per bag                  | Treasury contract            | 1               | RSA GF proposal for                                       | R 0.09            |

|             |        |            |                   |       |                         |        |
|-------------|--------|------------|-------------------|-------|-------------------------|--------|
|             |        |            |                   |       | continued funding, 2013 |        |
| Result card | R 0.76 | per card   | Retail quote      | 1.01  | Assumption              | R 0.77 |
| Male condom | R 0.52 | per condom | Treasury contract | 10.01 | Assumption              | R 5.23 |

|                         |                                                 |                  |                                    |                 |                                             |                   |
|-------------------------|-------------------------------------------------|------------------|------------------------------------|-----------------|---------------------------------------------|-------------------|
| <b>Intervention:</b>    | <b>General population HCT (positive result)</b> |                  |                                    |                 |                                             |                   |
| <b>Costing method:</b>  | Update from literature [4]                      |                  |                                    |                 |                                             |                   |
| <b>Total cost</b>       | <b>R 74,83 per test</b>                         |                  |                                    |                 |                                             |                   |
| <b>Ingredient</b>       | <b>Unit cost</b>                                | <b>Cost unit</b> | <b>Source</b>                      | <b>Quantity</b> | <b>Source</b>                               | <b>Total cost</b> |
| <i>As above, plus:</i>  |                                                 |                  |                                    |                 |                                             |                   |
| Advance test kit        | R 6.50                                          | per test         | Treasury contract RT41-2017        | 1.01            | RSA GF proposal for continued funding, 2013 | R 6.57            |
| First response test kit | R 8.17                                          | per test         | Treasury contract RT41-2017        | 0.007           | Assumed                                     | R 0.06            |
| Advance test kit        | R 6.50                                          | per test         | Treasury contract RT41-2017        | 0.007           | Assumed                                     | R 0.05            |
| ELISA                   | R 55.18                                         | per test         | NHLS 2018 price list               | 0.0002          | Assumed                                     | R 0.01            |
| Counsellor              | R 0.99                                          | per minute       | April 2018 Government Salary Scale | 20              | Assumed                                     | R 19.90           |

|                        |                                                                                  |
|------------------------|----------------------------------------------------------------------------------|
| <b>Intervention:</b>   | <b>Provider-initiated HCT</b>                                                    |
| <b>Costing method:</b> | Updated from literature [4]                                                      |
| <b>Total cost</b>      | <b>R 56.07 per test (negative result)<br/>R 82.66 per test (positive result)</b> |

|                        |                                                                                  |
|------------------------|----------------------------------------------------------------------------------|
| <b>Intervention:</b>   | <b>Mobile HCT</b>                                                                |
| <b>Costing method:</b> | Updated from literature [5]                                                      |
| <b>Total cost</b>      | <b>R 74.48 per test (negative result)<br/>R 87.92 per test (positive result)</b> |

|                        |                                                                                  |
|------------------------|----------------------------------------------------------------------------------|
| <b>Intervention:</b>   | <b>Home-based HCT</b>                                                            |
| <b>Costing method:</b> | Updated from literature [5]                                                      |
| <b>Total cost</b>      | <b>R 69.73 per test (negative result)<br/>R 77.42 per test (positive result)</b> |

|                        |                                                                     |                  |                 |                 |               |                   |
|------------------------|---------------------------------------------------------------------|------------------|-----------------|-----------------|---------------|-------------------|
| <b>Intervention:</b>   | <b>HCT invitations to male pregnancy partners (negative result)</b> |                  |                 |                 |               |                   |
| <b>Costing method:</b> | Ingredients                                                         |                  |                 |                 |               |                   |
| <b>Total cost</b>      | <b>R 50.79 per test</b>                                             |                  |                 |                 |               |                   |
| <b>Ingredient</b>      | <b>Unit cost</b>                                                    | <b>Cost unit</b> | <b>Source</b>   | <b>Quantity</b> | <b>Source</b> | <b>Total cost</b> |
| HCT invitation card    | R 1.82                                                              | per card         | Retail quote    | 1               | Assumption    | R 1.82            |
| BCC material design    | R 5,600.00                                                          | per day          | RSA Global Fund | 0.1             | Assumption    | R 0.56            |

|                                   |           |          |              |      |            |         |
|-----------------------------------|-----------|----------|--------------|------|------------|---------|
| BCC material translation          | R1,238.18 | per day  | Retail quote | 0.07 | Assumption | R 0.17  |
| General population HCT (negative) | R 48.24   | per test | See above    | 1    |            | R 48.24 |

|                                   |                                                                     |                  |                 |                 |               |                   |
|-----------------------------------|---------------------------------------------------------------------|------------------|-----------------|-----------------|---------------|-------------------|
| <b>Intervention:</b>              | <b>HCT invitations to male pregnancy partners (positive result)</b> |                  |                 |                 |               |                   |
| <b>Costing method:</b>            | Ingredients                                                         |                  |                 |                 |               |                   |
| <b>Total cost</b>                 | <b>R 79.87 per test</b>                                             |                  |                 |                 |               |                   |
| <b>Ingredient</b>                 | <b>Unit cost</b>                                                    | <b>Cost unit</b> | <b>Source</b>   | <b>Quantity</b> | <b>Source</b> | <b>Total cost</b> |
| HCT invitation card               | R 1.82                                                              | per card         | Retail quote    | 1               | Assumption    | R 1.82            |
| BCC material design               | R 5,600.00                                                          | per day          | RSA Global Fund | 0.1             | Assumption    | R 0.56            |
| BCC material translation          | R1,238.18                                                           | per day          | Retail quote    | 0.07            | Assumption    | R 0.17            |
| General population HCT (positive) | R 74,83                                                             | per test         | See above       | 1               |               | R 77.32           |

|                               |                                        |                  |                                                   |                 |                                             |                   |
|-------------------------------|----------------------------------------|------------------|---------------------------------------------------|-----------------|---------------------------------------------|-------------------|
| <b>Intervention:</b>          | <b>Workplace HCT (negative result)</b> |                  |                                                   |                 |                                             |                   |
| <b>Costing method:</b>        | Ingredients                            |                  |                                                   |                 |                                             |                   |
| <b>Total cost</b>             | <b>R 55.50 per test</b>                |                  |                                                   |                 |                                             |                   |
| <b>Ingredient</b>             | <b>Unit cost</b>                       | <b>Cost unit</b> | <b>Source</b>                                     | <b>Quantity</b> | <b>Source</b>                               | <b>Total cost</b> |
| Mobile van                    | R 2,108.26                             | per month        |                                                   | 0.001           | Assumption                                  | R 2.11            |
| Senior nurse                  | R 26 360                               | per month        | 2018 Government Salary Scale                      | 0.001           | Assumption                                  | R 26.36           |
| Community health workers (*4) | R 2,631.75                             | per month        | Global fund proposal                              | 0.001           | Assumption                                  | R 10.53           |
| Consent form                  | R 108.00                               | per 500 forms    | Retail quote                                      | 0,002           | Assumption                                  | R 0.22            |
| Bioscrub                      | R 155.18                               | per 5L           | Treasury contract                                 | 0.00101         | Assumption                                  | R 0.16            |
| Gloves                        | R 50.82                                | per pack 100     | Treasury contract RT76-2016                       | 0.02            | RSA GF proposal for continued funding, 2013 | R 1.03            |
| Cotton wool swabs             | R 81.25                                | per pack 100     | 2015-17 NDOH bandages & dressings tender contract | 0.01            | RSA GF proposal for continued funding, 2013 | R 0.82            |
| First response test kit       | R 8.17                                 | per test         | Treasury contract RT41-2017                       | 1.01            | RSA GF proposal for continued funding, 2013 | R 8.25            |
| Biohazard bag                 | R 0.09                                 | per material     | Retail quote                                      | 1.01            | Assumption                                  | R 0.09            |
| Results card                  | R 0.76                                 | per card         | Retail quote                                      | 1.01            | Assumption                                  | R 0.77            |
| Ground travel                 | R 3.55                                 | per km           | SARS rate                                         | 2               | Assumption                                  | R 7.10            |

|                         |                                        |                  |                             |                 |                                             |                   |
|-------------------------|----------------------------------------|------------------|-----------------------------|-----------------|---------------------------------------------|-------------------|
| <b>Intervention:</b>    | <b>Workplace HCT (positive result)</b> |                  |                             |                 |                                             |                   |
| <b>Costing method:</b>  | Ingredients                            |                  |                             |                 |                                             |                   |
| <b>Total cost</b>       | <b>R 63.14 per test</b>                |                  |                             |                 |                                             |                   |
| <b>Ingredient</b>       | <b>Unit cost</b>                       | <b>Cost unit</b> | <b>Source</b>               | <b>Quantity</b> | <b>Source</b>                               | <b>Total cost</b> |
| <i>As above, plus:</i>  |                                        |                  |                             |                 |                                             | R 55.50           |
| Advance test kit        | R 6.50                                 | per test         | Treasury contract RT41-2017 | 1.01            | RSA GF proposal for continued funding, 2013 | R 6.57            |
| First response test kit | R 8.17                                 | per test         | Treasury contract RT41-2017 | 0.06            | Assumption                                  | R 0.48            |
| Advance test kit        | R 6.50                                 | per test         | Treasury contract RT41-2017 | 0.06            | Assumption                                  | R 0.38            |
| ELISA                   | R 55.18                                | per test         | NHLS 2018 price list        | 0.004           | Assumption                                  | R 0.22            |

|                          |                                                 |                  |                                             |                 |               |                   |
|--------------------------|-------------------------------------------------|------------------|---------------------------------------------|-----------------|---------------|-------------------|
| <b>Intervention:</b>     | <b>Testing of adolescents (negative result)</b> |                  |                                             |                 |               |                   |
| <b>Costing method:</b>   | Ingredients                                     |                  |                                             |                 |               |                   |
| <b>Total cost</b>        | <b>R 104.34 per test</b>                        |                  |                                             |                 |               |                   |
| <b>Ingredient</b>        | <b>Unit cost</b>                                | <b>Cost unit</b> | <b>Source</b>                               | <b>Quantity</b> | <b>Source</b> | <b>Total cost</b> |
| Mobile van               | R 2,108,26                                      | per month        | Updated based on [6]                        | 0.0003          | Assumption    | R 0.59            |
| Administrative assistant | R 19,451.74                                     | per month        | 2018 Government Salary Scale                | 0.0003          | Assumption    | R 5.43            |
| Senior nurse             | R 26,359.83                                     | per month        | 2018 Government Salary Scale                | 0.001           | Assumption    | R 29.43           |
| Community health worker  | R 2,631.75                                      | per month        | RSA GF proposal for continued funding, 2013 | 0.007           | Assumption    | R 17.63           |
| Bond paper               | R 58.80                                         | per 500 pages    | Retail price                                | 0.002           | Assumption    | R 0.12            |
| Data technician          | R 16,319                                        | per month        | 2018 Government Salary Scale                | 0.0001          | Assumption    | R 2.28            |
| Driver                   | R 17,995                                        | per month        | 2018 Government Salary Scale                | 0,001           | Assumption    | R 20.09           |
| Cleaner                  | R 3,775                                         | per month        | 2018 Government Salary Scale                | 0.0001          | Assumption    | R0.53             |
| Bioscrub                 | R 155.18                                        | per 5L           | Treasury contract                           | 0.0002          | Assumption    | R 1.03            |
| First response test kit  | R 8.17                                          | per test         | Treasury contract RT41-2017                 | 1.01            | Assumption    | R 8.25            |
| Biohazard bag            | R 0.09                                          | per bag          | Retail quote                                | 1.01            | Assumption    | R 0.09            |
| Cotton wool swab         | R 81.65                                         | per 100          | Treasury contract                           | 0.01            | Assumption    | R 0.82            |

|              |        |            |                   |    |            |        |
|--------------|--------|------------|-------------------|----|------------|--------|
| Male condom  | R 0.52 | per condom | Treasury contract | 10 | Assumption | R 5.18 |
| Results card | R 0.76 | per card   | Retail quote      | 1  | Assumption | R 0.76 |

|                         |                                                 |                  |                             |                 |               |                   |
|-------------------------|-------------------------------------------------|------------------|-----------------------------|-----------------|---------------|-------------------|
| <b>Intervention:</b>    | <b>Testing of adolescents (positive result)</b> |                  |                             |                 |               |                   |
| <b>Costing method:</b>  | Ingredients                                     |                  |                             |                 |               |                   |
| <b>Total cost</b>       | <b>R 111.64 per test</b>                        |                  |                             |                 |               |                   |
| <b>Ingredient</b>       | <b>Unit cost</b>                                | <b>Cost unit</b> | <b>Source</b>               | <b>Quantity</b> | <b>Source</b> | <b>Total cost</b> |
| As above, plus:         |                                                 |                  |                             |                 |               |                   |
| Advance test kits       | R 6,50                                          | per test kit     | Treasury contract RT41-2017 | 1.01            | Assumption    | R 6.57            |
| First response test kit | R 8,17                                          | per test kit     | Treasury contract RT41-2017 | 0.06            | Assumption    | R 0.48            |
| Advance test kits       | R 6,50                                          | per test kit     | Treasury contract RT41-2017 | 0.006           | Assumption    | R 0.04            |
| Elisa                   | R 55,18                                         | per test         | NHLS 2018 price list        | 0.004           | Assumption    | R 0.22            |

## 7. Other bio-medical prevention interventions

|                                                  |                                                                                                               |                        |                          |                          |                              |            |                              |            |
|--------------------------------------------------|---------------------------------------------------------------------------------------------------------------|------------------------|--------------------------|--------------------------|------------------------------|------------|------------------------------|------------|
| <b>Intervention:</b>                             | <b>Pre-exposure prophylaxis (example for PrEP to young women)</b>                                             |                        |                          |                          |                              |            |                              |            |
| <b>Costing method:</b>                           | Ingredients                                                                                                   |                        |                          |                          |                              |            |                              |            |
| <b>Total cost</b>                                | <b>R 1,917.62 per patient year (first year)</b><br><b>R 1,647.07 per patient year (every year thereafter)</b> |                        |                          |                          |                              |            |                              |            |
|                                                  | <b>First year</b>                                                                                             |                        |                          |                          | <b>Every year thereafter</b> |            |                              |            |
| Drugs                                            | R 810.84                                                                                                      |                        |                          |                          | R 810.84                     |            |                              |            |
| Labs                                             | R 468.63                                                                                                      |                        |                          |                          | R 226.51                     |            |                              |            |
| HTS                                              | R 104.21                                                                                                      |                        |                          |                          | R 100.62                     |            |                              |            |
| STI                                              | R 37.69                                                                                                       |                        |                          |                          | R 33.70                      |            |                              |            |
| Social mobilisation                              | R 109.82                                                                                                      |                        |                          |                          | R 109.82                     |            |                              |            |
| Counselling/ dispensing                          | R 138.33                                                                                                      |                        |                          |                          | R 134.35                     |            |                              |            |
| Combination prevention                           | R 33.33                                                                                                       |                        |                          |                          | R 32.33                      |            |                              |            |
| Overheads                                        | R 149.01                                                                                                      |                        |                          |                          | R 133.12                     |            |                              |            |
| Training                                         | R 60.07                                                                                                       |                        |                          |                          | R 60.07                      |            |                              |            |
| M+E                                              | R 5.69                                                                                                        |                        |                          |                          | R 5.69                       |            |                              |            |
|                                                  | Health system level cost                                                                                      | Screening & initiation | Follow-up clinical visit | Follow-up pharmacy visit | Re-initiation visit          | Creatinine | Syphilis testing (follow-up) | Total cost |
| <b>Cost per visit (patient-level costs)</b>      |                                                                                                               |                        |                          |                          |                              |            |                              |            |
|                                                  |                                                                                                               | 336.43                 | 109.46                   | 78.60                    | 213.30                       | 28.71      | 29.72                        |            |
| <b>Cost per visit (health-system level cost)</b> |                                                                                                               |                        |                          |                          |                              |            |                              |            |
|                                                  | 219.11                                                                                                        | 23.55                  | 7.66                     | 5.50                     | 14.93                        |            |                              |            |
| <b>Number of visits</b>                          |                                                                                                               |                        |                          |                          |                              |            |                              |            |
| First year                                       |                                                                                                               | 1                      | 3                        | 8                        | 1                            | 3          | 0                            |            |

|                       |  |   |   |   |   |   |   |  |
|-----------------------|--|---|---|---|---|---|---|--|
| Every year thereafter |  | - | 4 | 8 | 1 | 1 | 1 |  |
|-----------------------|--|---|---|---|---|---|---|--|

|                                                |                                    |                          |                                                                 |                 |                                                                                                             |                   |
|------------------------------------------------|------------------------------------|--------------------------|-----------------------------------------------------------------|-----------------|-------------------------------------------------------------------------------------------------------------|-------------------|
| <b>Intervention:</b>                           | <b>Post-exposure prophylaxis</b>   |                          |                                                                 |                 |                                                                                                             |                   |
| <b>Costing method:</b>                         | Ingredients                        |                          |                                                                 |                 |                                                                                                             |                   |
| <b>Total cost</b>                              | <b>R 1,093.20 per patient year</b> |                          |                                                                 |                 |                                                                                                             |                   |
| <b>Ingredient</b>                              | <b>Unit cost</b>                   | <b>Cost unit</b>         | <b>Source</b>                                                   | <b>Quantity</b> | <b>Source</b>                                                                                               | <b>Total cost</b> |
| PEP regimen (TDF, 3TC and ATV/Rit)             | R 418.04                           | per month                | 2018 NDOH contract prices                                       | 1               | 2008 SAHIVSOC guidelines                                                                                    | R 418.04          |
| Space                                          | R 110.00                           | per square meter         | Estimate                                                        | 0.007           | Assumed                                                                                                     | R 0.73            |
| Electricity                                    | R1.97                              | per square meter         | Estimate                                                        | 0.007           | Assumed                                                                                                     | R 0.01            |
| Social Worker                                  | R 4.36                             | per minute of staff time | April 2018 Government Salary Scale                              | 27.78           | GF Budget 2013-2016                                                                                         | R 121.07          |
| Counsellor                                     | R 0.99                             | per minute of staff time | April 2018 Government Salary Scale                              | 277.76          | GF Budget 2013-2016RSA                                                                                      | R 275.46          |
| Driver NGO                                     | R 0.84                             | per minute of staff time | Estimate                                                        | 27.78           | Estimate                                                                                                    | R 23.41           |
| Monitoring & Evaluation officer NGO            | R 2.15                             | per minute of staff time | RSA Global Fund Grant portfolio budgets 2018                    | 13.89           | Assumed                                                                                                     | R 29.81           |
| Programme Manager                              | R 7.02                             | per minute of staff time | RSA Global Fund Grant portfolio budgets 2016                    | 6.94            | GF Budget 2013-2016                                                                                         | R 48.75           |
| IEC material (design, print, distribute)       | R 2.47                             | per material             | RSA GF proposal for continued funding, 2014, inflation adjusted | 1               | RSA GF Proposal for continued funding, 2013                                                                 | R 2.47            |
| Patient forms - printing                       | R 0.10                             | per form                 | RSA GF proposal, inflation adjusted                             | 1               | RSA GF Proposal for continued funding, 2013                                                                 | R 0.10            |
| HIV rapid test (average cost of all test kits) | R 6.95                             | per test                 | Treasury contract RT41-2017                                     | 1.31            | Assumed (for every 100 people tested, there will be 30 retests (HIV+ve + discordant tests) and 1 kit wasted | R 9.10            |
| Comfort packs                                  | R 147.90                           | per pack                 | Provincial DOH CG                                               | 1               | NACOSA GF Budget 2013-2016                                                                                  | R 147.90          |

|                         |          |                       |                                |        |                                             |         |
|-------------------------|----------|-----------------------|--------------------------------|--------|---------------------------------------------|---------|
|                         |          |                       | Business Plans                 |        |                                             |         |
| Needle                  | R 13.11  | per pack 100          | Contract HM08-2015SYR          | 1      | RSA GF Proposal for continued funding, 2013 | R 0.01  |
| Gloves                  | R 50.82  | per pack 100          | RSA GF proposal                | 0.01   |                                             | R 1.02  |
| Cotton wool swabs       | R 81.65  | per pack 100          | Treasury tender contract       | 0.01   |                                             | R 0.82  |
| Rapid HIV test disposal | R 74.09  | per 5l container      | 2013 RSA GF proposal, inflated | 0.001  |                                             | R 0.07  |
| Phone                   | R 449.00 | rental cost per month | Retail price                   | 0.0064 | Assumed                                     | R 2.87  |
| Ground travel           | R 3.61   | per km                | SARS rate                      | 3.2    | Assumed                                     | R 11.55 |

## REFERENCES

1. Callegari, L., C. C. Harper, A. van der Straten, M. Kamba, T. Chipato and N. S. Padian (2008). "Consistent condom use in married Zimbabwean women after a condom intervention." *Sex Transm Dis* 35(6): 624-630
2. Meyer-Rath, G., A. T. Brennan, M. P. Fox, T. Modisenyane, N. Tshabangu, L. Mohapi, S. Rosen and N. Martinson (2013). "Rates and cost of hospitalization before and after initiation of antiretroviral therapy in urban and rural settings in South Africa." *J Acquir Immune Defic Syndr* 62(3): 322-328.
3. Tchuente M, Haté V, McPherson D, Palmer E, Thambinayagam A, Loykissoonlal D, et al. Estimating client out-of-pocket costs for accessing voluntary medical male circumcision in South Africa. *PLoS One*. 2016;11(10):1–10.
4. Bassett, I. V., D. Govindasamy, A. S. Erlwanger, E. P. Hyle, K. Kranzer, N. van Schaik, F. Noubary, A. D. Paltiel, R. Wood, R. P. Walensky, E. Losina, L. G. Bekker and K. A. Freedberg (2014). "Mobile HIV screening in Cape Town, South Africa: clinical impact, cost and cost-effectiveness." *PLoS One* 9(1): e85197.
5. Smith, J. A., M. Sharma, C. Levin, J. M. Baeten, H. van Rooyen, C. Celum, T. B. Hallett and R. V. Barnabas (2015). "Cost-effectiveness of community-based strategies to strengthen the continuum of HIV care in rural South Africa: a health economic modelling analysis." *Lancet HIV* 2(4): e159-e168.
6. Tabana H, Nkonki L, Hongoro C, Doherty T, Ekström AM, Naik R, et al. (2015) A Cost-Effectiveness Analysis of a Home-Based HIV Counselling and Testing Intervention versus the Standard (Facility Based) HIV Testing Strategy in Rural South Africa. *PLoS ONE* 10(8): e0135048. doi:10.1371/journal.pone.0135048
